# Supplementary material for: Genome-Wide Analysis of Cation/Proton Antiporter Family in Soybean (Glycine max) and Functional Analysis of GmCHX20a on Salt Response
Source: MDPI journal article supplement (doi:10.3390/ijms242316560), 2023-11-21
Supplement: s1 [file s1]

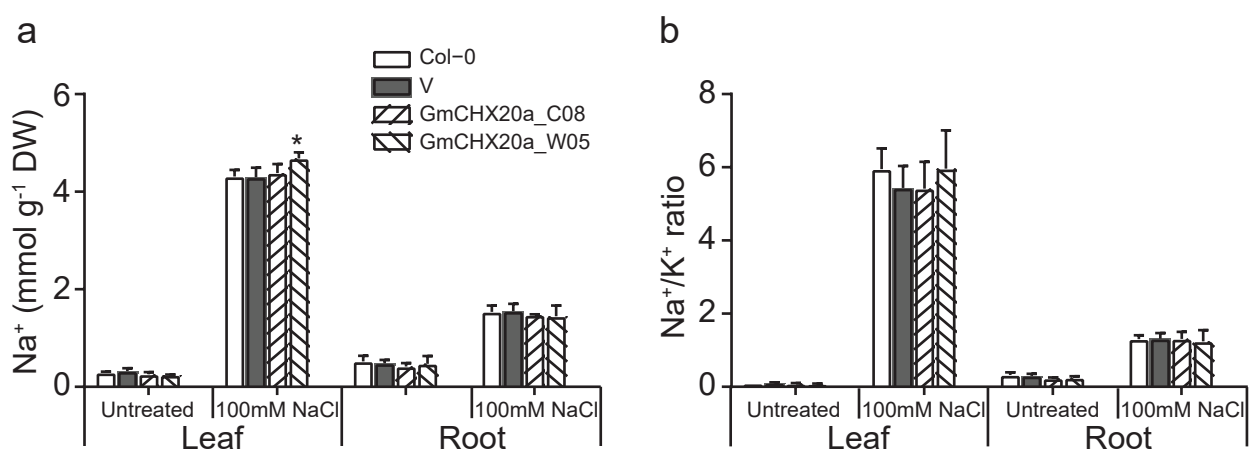

**Figure S4.** Na<sup>+</sup> content and Na<sup>+</sup>/K<sup>+</sup> ratio in *Arabidopsis* transgenic lines. The aerial parts and roots of seedlings treated with or without 100mM NaCl for 7 days were harvested separately. Then, the Na<sup>+</sup> content (a) and Na<sup>+</sup>/K<sup>+</sup> ratio (b) were detected. Values are mean  $\pm$  SD. The asterisk marks represented for significant differences in comparison to the wild type (Col-0) and the mock line (transformed with the empty vector, denoted as V) at  $p < 0.05$  (one-way ANOVA). GmCHX20a\_C08 and GmCHX20a\_W05 are the transgenic line expressing GmCHX20a from C08 to W05, respectively.
