# Supplementary material for: Genome-Wide Analysis of Cation/Proton Antiporter Family in Soybean (Glycine max) and Functional Analysis of GmCHX20a on Salt Response
Source: MDPI journal article supplement (doi:10.3390/ijms242316560), 2023-11-21
Supplement: s1 [file s1]

**Table S3.** Divergence between *GmCPA* gene pairs.

| Gene pair              | locus                               | Ks   | Ka   | Ka/Ks | Date (MYA) | Duplication event |
|------------------------|-------------------------------------|------|------|-------|------------|-------------------|
| GmCHX18a/<br>GmCHX18b  | Glyma.01g223600/<br>Glyma.11G019900 | 0.12 | 0.02 | 0.14  | 9.43       | segmental         |
| GmKEA1a/<br>GmKEA1b    | Glyma.03g014000/<br>Glyma.07G073700 | 0.10 | 0.02 | 0.22  | 8.03       | segmental         |
| GmKEA1a/<br>GmKEA2b    | Glyma.03G014000/<br>Glyma.09G262000 | 0.22 | 0.19 | 0.83  | 18.37      | segmental         |
| GmKEA1a/<br>GmKEA2a    | Glyma.03G014000/<br>Glyma.18G230100 | 0.20 | 0.18 | 0.88  | 16.53      | segmental         |
| GmCHX20a/<br>GmCHX20b2 | Glyma.03G171500/<br>Glyma.03G171700 | 2.13 | 0.38 | 0.18  | 174.84     | tandem            |
| GmCHX20a/<br>GmCHX20c  | Glyma.03G171500/<br>Glyma.13G131200 | 1.05 | 0.21 | 0.20  | 86.41      | segmental         |
| GmCHX22a/<br>GmCHX22g  | Glyma.03g233700/<br>Glyma.19G230900 | 0.99 | 0.34 | 0.34  | 81.41      | segmental         |
| GmNHX2d/<br>GmNHX2b    | Glyma.03g243000/<br>Glyma.10G158700 | 0.44 | 0.12 | 0.27  | 36.22      | segmental         |
| GmNHX2d/<br>GmNHX2e    | Glyma.03G243000/<br>Glyma.19G240500 | 0.06 | 0.02 | 0.32  | 5.23       | segmental         |
| GmNHX2d/<br>GmNHX2a    | Glyma.03G243000/<br>Glyma.20G229900 | 0.45 | 0.12 | 0.27  | 36.67      | segmental         |
| GmCHX22b/<br>GmCHX22c  | Glyma.04G187400/<br>Glyma.06G178500 | 0.28 | 0.16 | 0.58  | 22.82      | segmental         |
| GmCHX15a/<br>GmCHX15d  | Glyma.04g212200/<br>Glyma.05G192400 | 0.70 | 0.25 | 0.36  | 57.35      | segmental         |
| GmCHX15a/<br>GmCHX15b  | Glyma.04G212200/<br>Glyma.06G154200 | 0.21 | 0.05 | 0.22  | 17.22      | segmental         |
| GmCHX3a/<br>GmCHX3b    | Glyma.05G153700/<br>Glyma.18G001600 | 0.32 | 0.39 | 1.19  | 26.52      | segmental         |
| GmCHX15d/<br>GmCHX15b  | Glyma.05g192400/<br>Glyma.06G154200 | 0.28 | 0.38 | 1.39  | 22.58      | segmental         |
| GmKEA4a/<br>GmKEA4b    | Glyma.05g222500/<br>Glyma.08G029300 | 0.10 | 0.02 | 0.17  | 7.88       | segmental         |
| GmKEA1b/<br>GmKEA2b    | Glyma.07g073700/<br>Glyma.09G262000 | 0.44 | 0.12 | 0.27  | 36.33      | segmental         |
| GmKEA1b/<br>GmKEA2a    | Glyma.07G073700/<br>Glyma.18G230100 | 0.14 | 0.19 | 1.35  | 11.67      | segmental         |
| GmKEA3a/<br>GmKEA3b    | Glyma.07g184800/<br>Glyma.08G064600 | 0.10 | 0.02 | 0.21  | 8.12       | segmental         |
| GmNHX2f/<br>GmNHX2c    | Glyma.07g251900/<br>Glyma.17G022500 | 0.09 | 0.01 | 0.10  | 7.20       | segmental         |

| Gene pair             | locus                               | Ks   | Ka   | Ka/Ks | Date (MYA) | Duplication event |
|-----------------------|-------------------------------------|------|------|-------|------------|-------------------|
| GmNHX5c/<br>GmNHX5b   | Glyma.07g270400/<br>Glyma.09G018200 | 0.61 | 0.08 | 0.13  | 49.78      | segmental         |
| GmNHX5c/<br>GmNHX5a   | Glyma.07G270400/<br>Glyma.15G124100 | 0.53 | 0.08 | 0.15  | 43.04      | segmental         |
| GmNHX5b/<br>GmNHX5a   | Glyma.09g018200/<br>Glyma.15G124100 | 0.12 | 0.01 | 0.06  | 9.70       | segmental         |
| GmKEA5a/<br>GmKEA5b   | Glyma.09g152300/<br>Glyma.16G203200 | 0.07 | 0.01 | 0.15  | 5.98       | segmental         |
| GmCHX28c/<br>GmCHX28a | Glyma.09g228400/<br>Glyma.12G008100 | 0.17 | 0.07 | 0.40  | 13.61      | segmental         |
| GmKEA2b/<br>GmKEA2a   | Glyma.09g262000/<br>Glyma.18G230100 | 0.11 | 0.02 | 0.20  | 8.70       | segmental         |
| GmCHX28b/<br>GmCHX1   | Glyma.10g089900/<br>Glyma.12G241200 | 1.04 | 0.83 | 0.79  | 85.25      | segmental         |
| GmNHX2b/<br>GmNHX2e   | Glyma.10g158700/<br>Glyma.19G240500 | 0.48 | 0.12 | 0.24  | 39.67      | segmental         |
| GmNHX2b/<br>GmNHX2a   | Glyma.10G158700/<br>Glyma.20G229900 | 0.10 | 0.01 | 0.09  | 8.48       | segmental         |
| GmCHX14b/<br>GmCHX29a | Glyma.11G163600/<br>Glyma.11G234000 | 1.13 | 0.77 | 0.68  | 92.74      | segmental         |
| GmCHX14b/<br>GmCHX30a | Glyma.11G163600/<br>Glyma.14G200000 | 1.32 | 0.72 | 0.54  | 108.11     | segmental         |
| GmCHX14b/<br>GmCHX29b | Glyma.11G163600/<br>Glyma.18G023000 | 0.94 | 0.82 | 0.87  | 76.80      | segmental         |
| GmCHX14b/<br>GmCHX14a | Glyma.11G163600/<br>Glyma.18G056900 | 0.14 | 0.06 | 0.40  | 11.79      | segmental         |
| GmCHX22f/<br>GmCHX22g | Glyma.11g229400/<br>Glyma.18G027900 | 0.19 | 0.05 | 0.27  | 15.30      | segmental         |
| GmCHX29a/<br>GmCHX30a | Glyma.11g234000/<br>Glyma.14G200000 | 1.05 | 0.74 | 0.70  | 85.93      | segmental         |
| GmCHX29a/<br>GmCHX29b | Glyma.11G234000/<br>Glyma.18G023000 | 0.15 | 0.09 | 0.60  | 12.16      | segmental         |
| GmCHX29a/<br>GmCHX32  | Glyma.11G234000/<br>Glyma.18G056800 | 1.90 | 0.65 | 0.34  | 155.82     | segmental         |
| GmCHX19c/<br>GmCHX19b | Glyma.13g116400/<br>Glyma.17G043400 | 0.09 | 0.03 | 0.28  | 7.45       | segmental         |
| GmCHX4c/<br>GmCHX4b   | Glyma.14G037600/<br>Glyma.14G037700 | 0.01 | 0.00 | 0.44  | 0.77       | tandem            |
| GmCHX4c/<br>GmCHX4d   | Glyma.14G037600/<br>Glyma.14G037800 | 0.21 | 0.09 | 0.41  | 17.31      | tandem            |
| GmCHX4c/<br>GmCHX4e   | Glyma.14G037600/<br>Glyma.20G045400 | 0.41 | 0.52 | 1.27  | 33.29      | segmental         |

| Gene pair             | locus                               | Ks   | Ka   | Ka/Ks | Date (MYA) | Duplication event |
|-----------------------|-------------------------------------|------|------|-------|------------|-------------------|
| GmCHX4b/<br>GmCHX4d   | Glyma.14G037700/<br>Glyma.14G037800 | 0.21 | 0.09 | 0.41  | 17.49      | tandem            |
| GmKEA4d/<br>GmKEA4c   | Glyma.14g093900/<br>Glyma.17G229700 | 0.08 | 0.01 | 0.10  | 6.36       | segmental         |
| GmCHX30a/<br>GmCHX30b | Glyma.14G200000/<br>Glyma.14G200100 | 0.26 | 0.13 | 0.50  | 21.54      | tandem            |
| GmCHX30a/<br>GmCHX29b | Glyma.14G200000/<br>Glyma.18G023000 | 0.89 | 0.80 | 0.90  | 73.09      | segmental         |
| GmCHX30a/<br>GmCHX32  | Glyma.14g200000/<br>Glyma.18G056800 | 0.89 | 0.79 | 0.89  | 72.55      | segmental         |
| GmCHX29b/<br>GmCHX32  | Glyma.18g023000/<br>Glyma.18G056800 | 1.87 | 0.68 | 0.36  | 153.43     | segmental         |
| GmCHX31a/<br>GmCHX31b | Glyma.18G023700/<br>Glyma.18G023800 | 0.48 | 0.47 | 0.97  | 39.41      | tandem            |
| GmNHX2e/<br>GmNHX2a   | Glyma.19g240500/<br>Glyma.20G229900 | 0.49 | 0.11 | 0.23  | 40.15      | segmental         |
