# Supplementary material for: Genome-Wide Analysis of Cation/Proton Antiporter Family in Soybean (Glycine max) and Functional Analysis of GmCHX20a on Salt Response
Source: MDPI journal article supplement (doi:10.3390/ijms242316560), 2023-11-21
Supplement: s1 [file s1]

**Table S5.** Number of *cis*-acting elements in the promoter regions of the GmCPA genes.

| Group | Name    | GeneID          | light<br>responsive<br>element | development<br>- related<br>element | stress -<br>responsive<br>element | MeJA -<br>responsive<br>element | ABA -<br>responsive<br>element | SA-<br>responsive<br>element | auxin-<br>responsive<br>element | gibberellin<br>-responsive<br>element |
|-------|---------|-----------------|--------------------------------|-------------------------------------|-----------------------------------|---------------------------------|--------------------------------|------------------------------|---------------------------------|---------------------------------------|
| NHXIa | GmNHX2a | Glyma.20G229900 | 9                              | 0                                   | 3                                 | 4                               | 3                              | 0                            | 0                               | 0                                     |
|       | GmNHX2b | Glyma.10G158700 | 13                             | 2                                   | 0                                 | 0                               | 2                              | 1                            | 1                               | 0                                     |
|       | GmNHX2d | Glyma.03G243000 | 11                             | 1                                   | 8                                 | 0                               | 1                              | 0                            | 1                               | 0                                     |
|       | GmNHX2e | Glyma.19G240500 | 15                             | 1                                   | 3                                 | 0                               | 0                              | 0                            | 0                               | 0                                     |
|       | GmNHX2f | Glyma.07G251900 | 18                             | 3                                   | 1                                 | 6                               | 2                              | 0                            | 0                               | 1                                     |
|       | GmNHX2c | Glyma.17G022500 | 15                             | 3                                   | 4                                 | 0                               | 3                              | 0                            | 0                               | 0                                     |
|       | GmNHX3  | Glyma.08G324200 | 17                             | 0                                   | 3                                 | 4                               | 3                              | 1                            | 2                               | 0                                     |
| NHXIb | GmNHX5a | Glyma.15G124100 | 14                             | 0                                   | 5                                 | 0                               | 1                              | 0                            | 1                               | 0                                     |
|       | GmNHX5b | Glyma.09G018200 | 15                             | 0                                   | 4                                 | 4                               | 3                              | 0                            | 0                               | 0                                     |
|       | GmNHX5c | Glyma.07G270400 | 2                              | 4                                   | 0                                 | 0                               | 0                              | 0                            | 0                               | 1                                     |
| NHXII | GmNHX7  | Glyma.08G092000 | 14                             | 2                                   | 3                                 | 4                               | 0                              | 1                            | 0                               | 0                                     |
| KEAI  | GmKEA1a | Glyma.03G014000 | 10                             | 1                                   | 4                                 | 0                               | 0                              | 1                            | 1                               | 0                                     |
|       | GmKEA1b | Glyma.07G073700 | 13                             | 0                                   | 2                                 | 2                               | 0                              | 0                            | 1                               | 1                                     |
|       | GmKEA2a | Glyma.18G230100 | 11                             | 2                                   | 6                                 | 0                               | 2                              | 1                            | 0                               | 0                                     |
|       | GmKEA2b | Glyma.09G262000 | 16                             | 2                                   | 4                                 | 0                               | 3                              | 3                            | 0                               | 0                                     |
|       | GmKEA3a | Glyma.07G184800 | 18                             | 3                                   | 6                                 | 0                               | 2                              | 0                            | 0                               | 1                                     |
|       | GmKEA3b | Glyma.08G064600 | 15                             | 2                                   | 1                                 | 2                               | 0                              | 0                            | 1                               | 0                                     |
| KEAII | GmKEA4a | Glyma.05G222500 | 9                              | 1                                   | 5                                 | 0                               | 2                              | 0                            | 0                               | 0                                     |
|       | GmKEA4b | Glyma.08G029300 | 19                             | 0                                   | 1                                 | 0                               | 2                              | 0                            | 0                               | 0                                     |
|       | GmKEA4c | Glyma.17G229700 | 19                             | 1                                   | 2                                 | 2                               | 0                              | 0                            | 1                               | 0                                     |
|       | GmKEA4d | Glyma.14G093900 | 19                             | 0                                   | 4                                 | 2                               | 0                              | 1                            | 1                               | 0                                     |
|       | GmKEA5a | Glyma.09G152300 | 22                             | 2                                   | 2                                 | 2                               | 4                              | 0                            | 0                               | 1                                     |
|       | GmKEA5b | Glyma.16G203200 | 13                             | 1                                   | 0                                 | 0                               | 4                              | 1                            | 0                               | 3                                     |

| Group  | Name     | GeneID          | light<br>responsive<br>element | development<br>- related<br>element | stress -<br>responsive<br>element | MeJA -<br>responsive<br>element | ABA -<br>responsive<br>element | SA-<br>responsive<br>element | auxin-<br>responsive<br>element | gibberellin<br>-responsive<br>element |
|--------|----------|-----------------|--------------------------------|-------------------------------------|-----------------------------------|---------------------------------|--------------------------------|------------------------------|---------------------------------|---------------------------------------|
| CHXI   | GmCHX1   | Glyma.12G241200 | 12                             | 3                                   | 4                                 | 2                               | 3                              | 1                            | 0                               | 0                                     |
|        | GmCHX28a | Glyma.12G008100 | 16                             | 3                                   | 6                                 | 0                               | 1                              | 1                            | 0                               | 1                                     |
|        | GmCHX28c | Glyma.09G228400 | 12                             | 1                                   | 3                                 | 2                               | 0                              | 1                            | 1                               | 0                                     |
|        | GmCHX28b | Glyma.10G089900 | 24                             | 2                                   | 1                                 | 0                               | 0                              | 1                            | 2                               | 0                                     |
| CHXV   | GmCHX25a | Glyma.18G057400 | 18                             | 2                                   | 4                                 | 2                               | 2                              | 0                            | 1                               | 2                                     |
|        | GmCHX25b | Glyma.11G164200 | 14                             | 1                                   | 3                                 | 0                               | 0                              | 0                            | 0                               | 0                                     |
| CHXIII | GmCHX29a | Glyma.11G234000 | 13                             | 1                                   | 2                                 | 2                               | 3                              | 1                            | 0                               | 2                                     |
|        | GmCHX29b | Glyma.18G023000 | 17                             | 0                                   | 3                                 | 2                               | 4                              | 0                            | 0                               | 3                                     |
|        | GmCHX30a | Glyma.14G200000 | 18                             | 1                                   | 5                                 | 2                               | 0                              | 0                            | 0                               | 0                                     |
|        | GmCHX30b | Glyma.14G200100 | 8                              | 2                                   | 1                                 | 2                               | 0                              | 0                            | 2                               | 0                                     |
| CHXII  | GmCHX3a  | Glyma.05G153700 | 5                              | 1                                   | 5                                 | 0                               | 1                              | 1                            | 0                               | 3                                     |
|        | GmCHX3b  | Glyma.18G001600 | 10                             | 0                                   | 6                                 | 2                               | 1                              | 1                            | 0                               | 1                                     |
|        | GmCHX3c  | Glyma.02G218800 | 11                             | 0                                   | 5                                 | 0                               | 0                              | 1                            | 0                               | 0                                     |
|        | GmCHX4e  | Glyma.20G045400 | 11                             | 1                                   | 4                                 | 0                               | 0                              | 1                            | 0                               | 1                                     |
|        | GmCHX4d  | Glyma.14G037800 | 20                             | 2                                   | 3                                 | 2                               | 3                              | 1                            | 0                               | 0                                     |
|        | GmCHX4c  | Glyma.14G037600 | 21                             | 2                                   | 4                                 | 0                               | 2                              | 0                            | 0                               | 0                                     |
|        | GmCHX4b  | Glyma.14G037700 | 11                             | 3                                   | 3                                 | 2                               | 2                              | 2                            | 1                               | 0                                     |
|        | GmCHX4a  | Glyma.09G128600 | 16                             | 2                                   | 5                                 | 0                               | 2                              | 0                            | 1                               | 1                                     |
| CHXIII | GmCHX32  | Glyma.18G056800 | 15                             | 0                                   | 4                                 | 2                               | 1                              | 0                            | 0                               | 0                                     |
|        | GmCHX14a | Glyma.18G056900 | 10                             | 2                                   | 7                                 | 0                               | 0                              | 0                            | 4                               | 1                                     |
|        | GmCHX14b | Glyma.11G163600 | 12                             | 3                                   | 1                                 | 4                               | 1                              | 0                            | 0                               | 0                                     |
|        | GmCHX31a | Glyma.18G023700 | 10                             | 1                                   | 2                                 | 2                               | 3                              | 0                            | 0                               | 1                                     |
|        | GmCHX31b | Glyma.18G023800 | 17                             | 2                                   | 2                                 | 4                               | 1                              | 2                            | 0                               | 0                                     |

| Group  | Name      | GeneID          | light<br>responsive<br>element | development<br>- related<br>element | stress -<br>responsive<br>element | MeJA -<br>responsive<br>element | ABA -<br>responsive<br>element | SA-<br>responsive<br>element | auxin-<br>responsive<br>element | gibberellin<br>-responsive<br>element |
|--------|-----------|-----------------|--------------------------------|-------------------------------------|-----------------------------------|---------------------------------|--------------------------------|------------------------------|---------------------------------|---------------------------------------|
| CHXIVc | GmCHX20b2 | Glyma.03G171700 | 8                              | 3                                   | 4                                 | 4                               | 0                              | 1                            | 0                               | 0                                     |
|        | GmCHX20a  | Glyma.03G171500 | 12                             | 3                                   | 2                                 | 6                               | 3                              | 0                            | 1                               | 0                                     |
|        | GmCHX20b1 | Glyma.03G171600 | 12                             | 0                                   | 2                                 | 2                               | 0                              | 0                            | 0                               | 0                                     |
|        | GmCHX20c  | Glyma.13G131200 | 13                             | 3                                   | 4                                 | 2                               | 4                              | 1                            | 0                               | 1                                     |
| CHXIVb | GmCHX18a  | Glyma.01G223600 | 19                             | 1                                   | 3                                 | 0                               | 3                              | 0                            | 0                               | 1                                     |
|        | GmCHX18b  | Glyma.11G019900 | 20                             | 1                                   | 1                                 | 2                               | 1                              | 0                            | 0                               | 0                                     |
|        | GmCHX19a  | Glyma.13G081300 | 13                             | 4                                   | 3                                 | 0                               | 6                              | 0                            | 0                               | 0                                     |
|        | GmCHX19b  | Glyma.17G043400 | 17                             | 1                                   | 2                                 | 2                               | 4                              | 0                            | 1                               | 1                                     |
|        | GmCHX19c  | Glyma.13G116400 | 17                             | 2                                   | 4                                 | 2                               | 7                              | 2                            | 1                               | 0                                     |
| CHXIVa | GmCHX15a  | Glyma.04G212200 | 15                             | 0                                   | 2                                 | 2                               | 3                              | 0                            | 1                               | 0                                     |
|        | GmCHX15b  | Glyma.06G154200 | 13                             | 2                                   | 7                                 | 2                               | 7                              | 0                            | 2                               | 2                                     |
|        | GmCHX15d  | Glyma.05G192400 | 18                             | 3                                   | 1                                 | 0                               | 3                              | 0                            | 1                               | 0                                     |
|        | GmCHX15c  | Glyma.15G066300 | 20                             | 3                                   | 7                                 | 0                               | 5                              | 0                            | 1                               | 1                                     |
| CHXIVd | GmCHX22a  | Glyma.03G233700 | 14                             | 0                                   | 6                                 | 0                               | 2                              | 0                            | 0                               | 1                                     |
|        | GmCHX22h  | Glyma.19G230900 | 14                             | 1                                   | 3                                 | 0                               | 1                              | 0                            | 0                               | 1                                     |
|        | GmCHX22d  | Glyma.08G057800 | 15                             | 2                                   | 2                                 | 6                               | 5                              | 0                            | 1                               | 2                                     |
|        | GmCHX22e  | Glyma.10G131500 | 10                             | 1                                   | 0                                 | 4                               | 0                              | 1                            | 0                               | 2                                     |
|        | GmCHX22b  | Glyma.04G187400 | 19                             | 4                                   | 5                                 | 0                               | 8                              | 0                            | 1                               | 0                                     |
|        | GmCHX22c  | Glyma.06G178500 | 7                              | 1                                   | 4                                 | 8                               | 2                              | 0                            | 0                               | 0                                     |
|        | GmCHX22f  | Glyma.11G229400 | 13                             | 3                                   | 2                                 | 0                               | 0                              | 2                            | 0                               | 0                                     |
|        | GmCHX22g  | Glyma.18G027900 | 14                             | 0                                   | 2                                 | 2                               | 2                              | 1                            | 1                               | 0                                     |
|        | GmCHX23   | Glyma.16G039700 | 16                             | 0                                   | 5                                 | 2                               | 3                              | 1                            | 1                               | 1                                     |
