# Supplementary material for: Genome-Wide Analysis of Cation/Proton Antiporter Family in Soybean (Glycine max) and Functional Analysis of GmCHX20a on Salt Response
Source: MDPI journal article supplement (doi:10.3390/ijms242316560), 2023-11-21
Supplement: s1 [file s1]

Figure S1: Chromosomal locations of the *GmCPA* genes;  
Figure S2: Heat map exhibiting the expression profiles of *GmCPAs* under salt stress;  
Figure S3: The effects of the *GmCHX20a* overexpression on the H<sub>2</sub>O<sub>2</sub> contents under salt stress by DAB staining;  
Figure S4: Na<sup>+</sup> content and Na<sup>+</sup>/K<sup>+</sup> ratio in Arabidopsis transgenic lines;  
Table S1: The list of the CPA family members in soybean;  
Table S2: Conserved motifs of GmCPA predicted by MEME;  
Table S3: Divergence between *GmCPA* gene pairs;  
Table S4: *Cis*-acting regulatory elements in the promoter regions of the *GmCPA* genes;  
Table S5: Number of *cis*-acting elements in the promoter regions of the *GmCPA* genes;  
Table S6: Primers used in this study.
