# Supplementary material for: Genome-Wide Analysis of Cation/Proton Antiporter Family in Soybean (Glycine max) and Functional Analysis of GmCHX20a on Salt Response
Source: MDPI journal article supplement (doi:10.3390/ijms242316560), 2023-11-21
Supplement: s1 [file s1]

**Table S6.** Primers used in this study.

| Name*    | Sequences (5' to 3')             | Gene                                             | Purpose         |
|----------|----------------------------------|--------------------------------------------------|-----------------|
| JO198F   | TCACTGTGCCCTTTCTTGGA             | GmNHX2e<br>(Glyma.19G240500)                     | qRT-PCR         |
| JO199R   | CTACCACCAAAAACCGGACG             |                                                  |                 |
| JO194F   | CAAGCACTTCCCAAACGTGA             | GmKEA1b<br>(Glyma.07g073700)                     | qRT-PCR         |
| JO195R   | TAGTCGCTGCAATCTCCGAT             |                                                  |                 |
| JO196F   | AGTATTTGGCCCATGCTTGC             | GmKEA3a<br>(Glyma.07g184800)                     | qRT-PCR         |
| JO197R   | AGTGAAGTCCCTGCAACAGT             |                                                  |                 |
| JO192F   | TCACGTGTTGTGCCATGAAG             | GmCHX4d,<br>(Glyma.14g037800)                    | qRT-PCR         |
| JO193R   | AGAAACCATCCGTTTTGGGC             |                                                  |                 |
| JO200F   | CCTCTCGTGA CTGCTGTGTA            | GmCHX18a,<br>(Glyma.01g223600)                   | qRT-PCR         |
| JO201R   | CACCTTCCGGATTCTCTT               |                                                  |                 |
| JO182F   | TTGTTGATCGTGGGCTTGGT             | GmCHX18b,<br>(Glyma.11G019900)                   | qRT-PCR         |
| JO183R   | AGCAATCTGATGCCAGGGTG             |                                                  |                 |
| JO184F   | CCTCTTTGGGGCTTTTGTGC             | GmCHX19b,<br>(Glyma.17G043400)                   | qRT-PCR         |
| JO185R   | TGCCCAAGAAAGTCCTCCAC             |                                                  |                 |
| JO202F   | CTAGCTTGCTTCCACACCAC             | GmCHX19c,<br>(Glyma.13g116400)                   | qRT-PCR         |
| JO203R   | ATTCTTGCGTGCCTTGTGAA             |                                                  |                 |
| JO113F   | CGTATGCATCATCTTCTTTGG            | <i>GmCHX20a</i> ,<br>( <i>Glyma.03G171500</i> )  | qRT-PCR         |
| JO114R   | GGTCATCCTTTTCAACAAACC            |                                                  |                 |
| JO180F   | TATGGGTGCTCTTCTCAGGG             | <i>GmCHX20b1</i> ,<br>( <i>Glyma.03G171600</i> ) | qRT-PCR         |
| JO181R   | GGGTAACACGTCTTGTTCGTG            |                                                  |                 |
| JO186F   | CAATACTCGCCAAGCCACAG             | GmCHX22d,<br>(Glyma.08G057800)                   | qRT-PCR         |
| JO187R   | GGGTTGGCTACTAGGCTTCT             |                                                  |                 |
| JO188F   | CTCCTTATCACCAAGGGCCA             | GmCHX28a,<br>(Glyma.12G008100)                   | qRT-PCR         |
| JO189R   | TCCAGTAATTGGAGGGCGTT             |                                                  |                 |
| JO190F   | TCATCGTTTGGCGCTTCAAT             | GmCHX28b,<br>(Glyma.10G089900)                   | qRT-PCR         |
| JO191R   | GCACAATACTGGTGT CAGCC            |                                                  |                 |
| GmELF1bF | CCACTGCTGAAGAAGATGATGATG         | Glyma.02G276600,<br>Glyma.14G039100              | qRT-PCR         |
| GmELF1bR | AAGGACAGAAGACTTGCCACTC           |                                                  |                 |
| JO138F   | AATCTAGAATGCATATGGCGTTGA<br>ACAT | <i>GmCHX20a</i>                                  | cDNA<br>cloning |
| JO139R   | GGCTCGAGTTACACTACGTTGTG<br>TTTG  |                                                  |                 |
| Act2F    | ACATTGTGCTCAGTGGTGGA             | <i>AtACT2</i><br>( <i>At3g18780</i> )            | qRT-PCR         |
| Act2R    | TCATACTCGGCCTTGAGAT              |                                                  |                 |

\*F:forward primer; R: reverse primer.
