# Supplementary material for: Genome-Wide Analysis of Cation/Proton Antiporter Family in Soybean (Glycine max) and Functional Analysis of GmCHX20a on Salt Response
Source: MDPI journal article supplement (doi:10.3390/ijms242316560), 2023-11-21
Supplement: s1 [file s1]

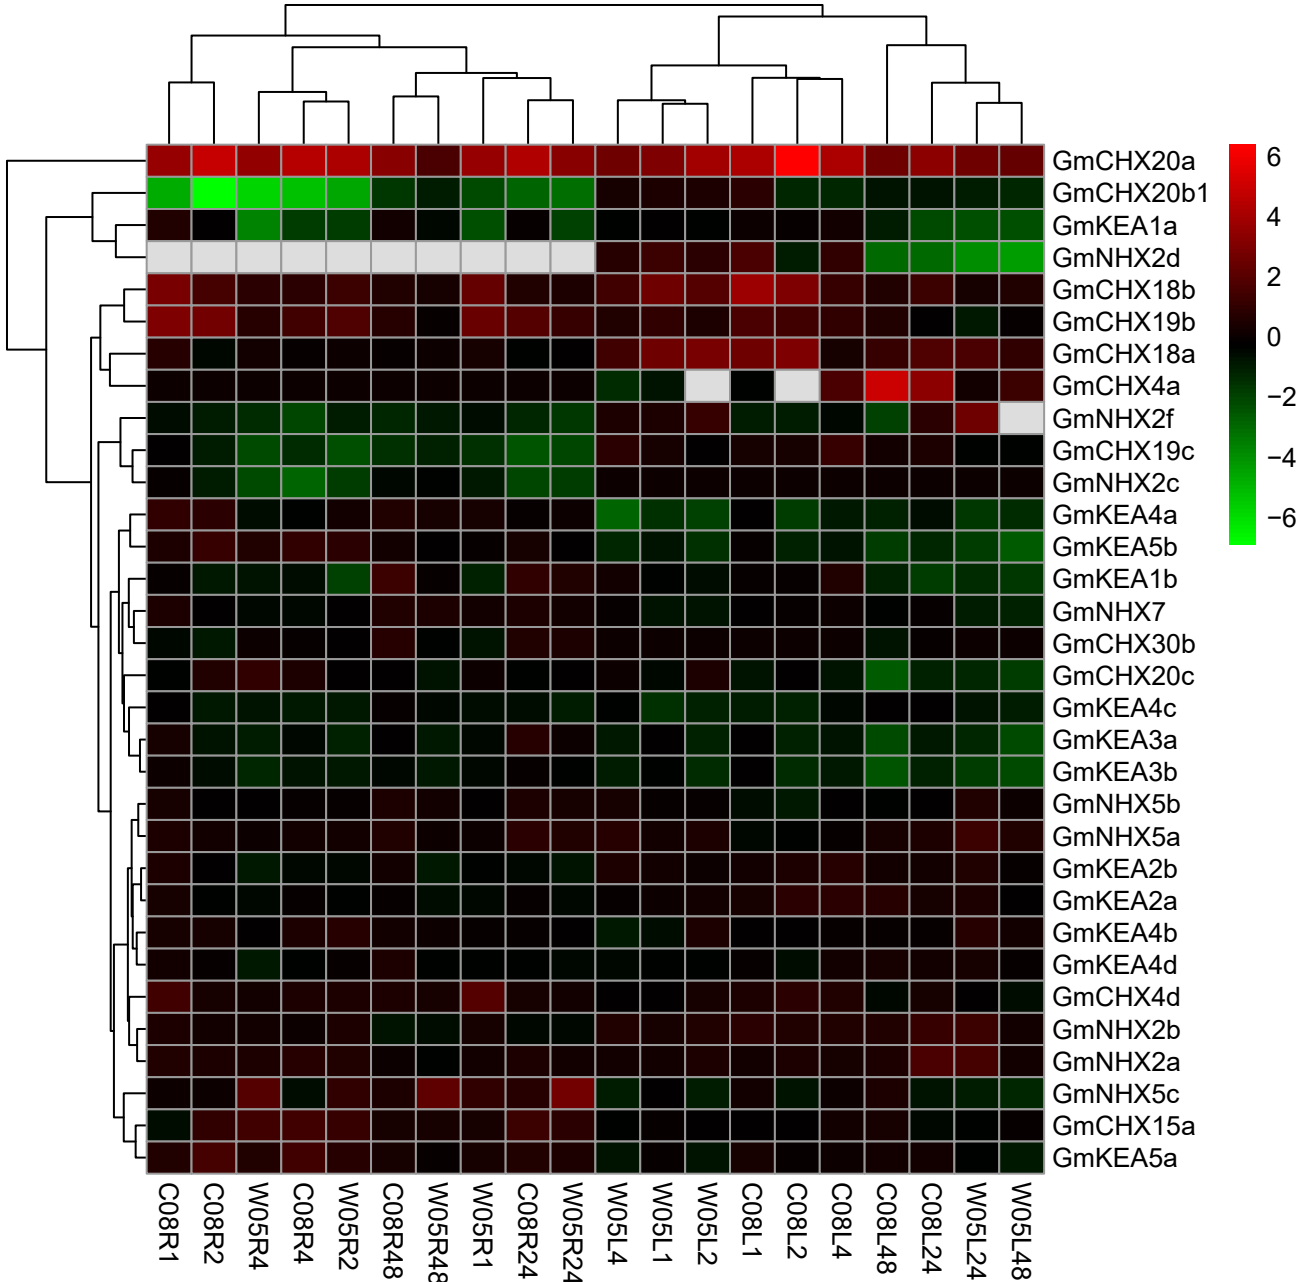

**Figure S2.** Heat map exhibiting the expression profiles of *GmCPAs* under salt stress. The log<sub>2</sub> values of the relative expression data compared with the controls were presented by different colors. The color scale was shown on the right. Green indicated reduced expression and red up-regulated expression. C08L1, C08L2, C08L4, C08L24, and C08L48 presented for the leaves collected from the cultivated soybean C08 at 1 h, 2 h, 4 h, 24 h, and 48 h after salt treatments, respectively. W05L1, W05L2, W05L4, W05L24, and W05L48 presented for the leaves collected from the wild soybean W05 at 1 h, 2 h, 4 h, 24 h, and 48 h after salt treatments, respectively. C08R1, C08R2, C08R4, C08R24, and C08R48 presented for the roots collected from C08 at 1 h, 2 h, 4 h, 24 h, and 48 h after salt treatments, respectively. W05R1, W05R2, W05R4, W05R24, and W05R48 presented for the leaves collected from W05 at 1 h, 2 h, 4 h, 24 h, and 48 h after salt treatments, respectively.
