# Supplementary material for: Genome-Wide Analysis of Cation/Proton Antiporter Family in Soybean (Glycine max) and Functional Analysis of GmCHX20a on Salt Response
Source: MDPI journal article supplement (doi:10.3390/ijms242316560), 2023-11-21
Supplement: s1 [file s1]

**Table S2.** Conserved motifs of GmCPA predicted by MEME.

| Motif | E-value   | Sites | Width | Sequence                                               |
|-------|-----------|-------|-------|--------------------------------------------------------|
| 1     | 1.2e-775  | 43    | 41    | VSYRVAVJFIGGPDDREALAYAWRMAEHPSGVK<br>LTVVRFVLS         |
| 2     | 7.8e-741  | 43    | 41    | GAVSVQTYTAISPYSTMHEDICNLALDKRASJII<br>LPFHKQW          |
| 3     | 1.1e-647  | 60    | 37    | ALSVTSFPVVARILAEKJLNTELGRLAJSAALIN<br>DV               |
| 4     | 6.3e-471  | 43    | 21    | RALNQNVLEHAPCSVGILVDR                                  |
| 5     | 9.60e-288 | 11    | 50    | YIIRHSTDREVALMVLMAVLSYMLAELFYLSGIL<br>TVFFCGIVMSHYTWHN |
| 6     | 8.80e-287 | 44    | 17    | SECPELGVIGDLLASSD                                      |
| 7     | 2.1e-444  | 56    | 31    | GMPLKDGLALGLLLNTKGLVELVVLNIAKBQ                        |
| 8     | 2.1e-419  | 42    | 28    | ELRILACIHNPRNIPSMINLLEASNPTR                           |
| 9     | 4.20e-221 | 60    | 15    | FGLIFFLFLVGLEMD                                        |
| 10    | 3.70e-193 | 58    | 15    | LGAFVFGLIIEGPP                                         |
