# Supplementary figures and images for: Genome-Wide Analysis of Cation/Proton Antiporter Family in Soybean (Glycine max) and Functional Analysis of GmCHX20a on Salt Response
Source: MDPI journal article supplement (doi:10.3390/ijms242316560), 2023-11-21

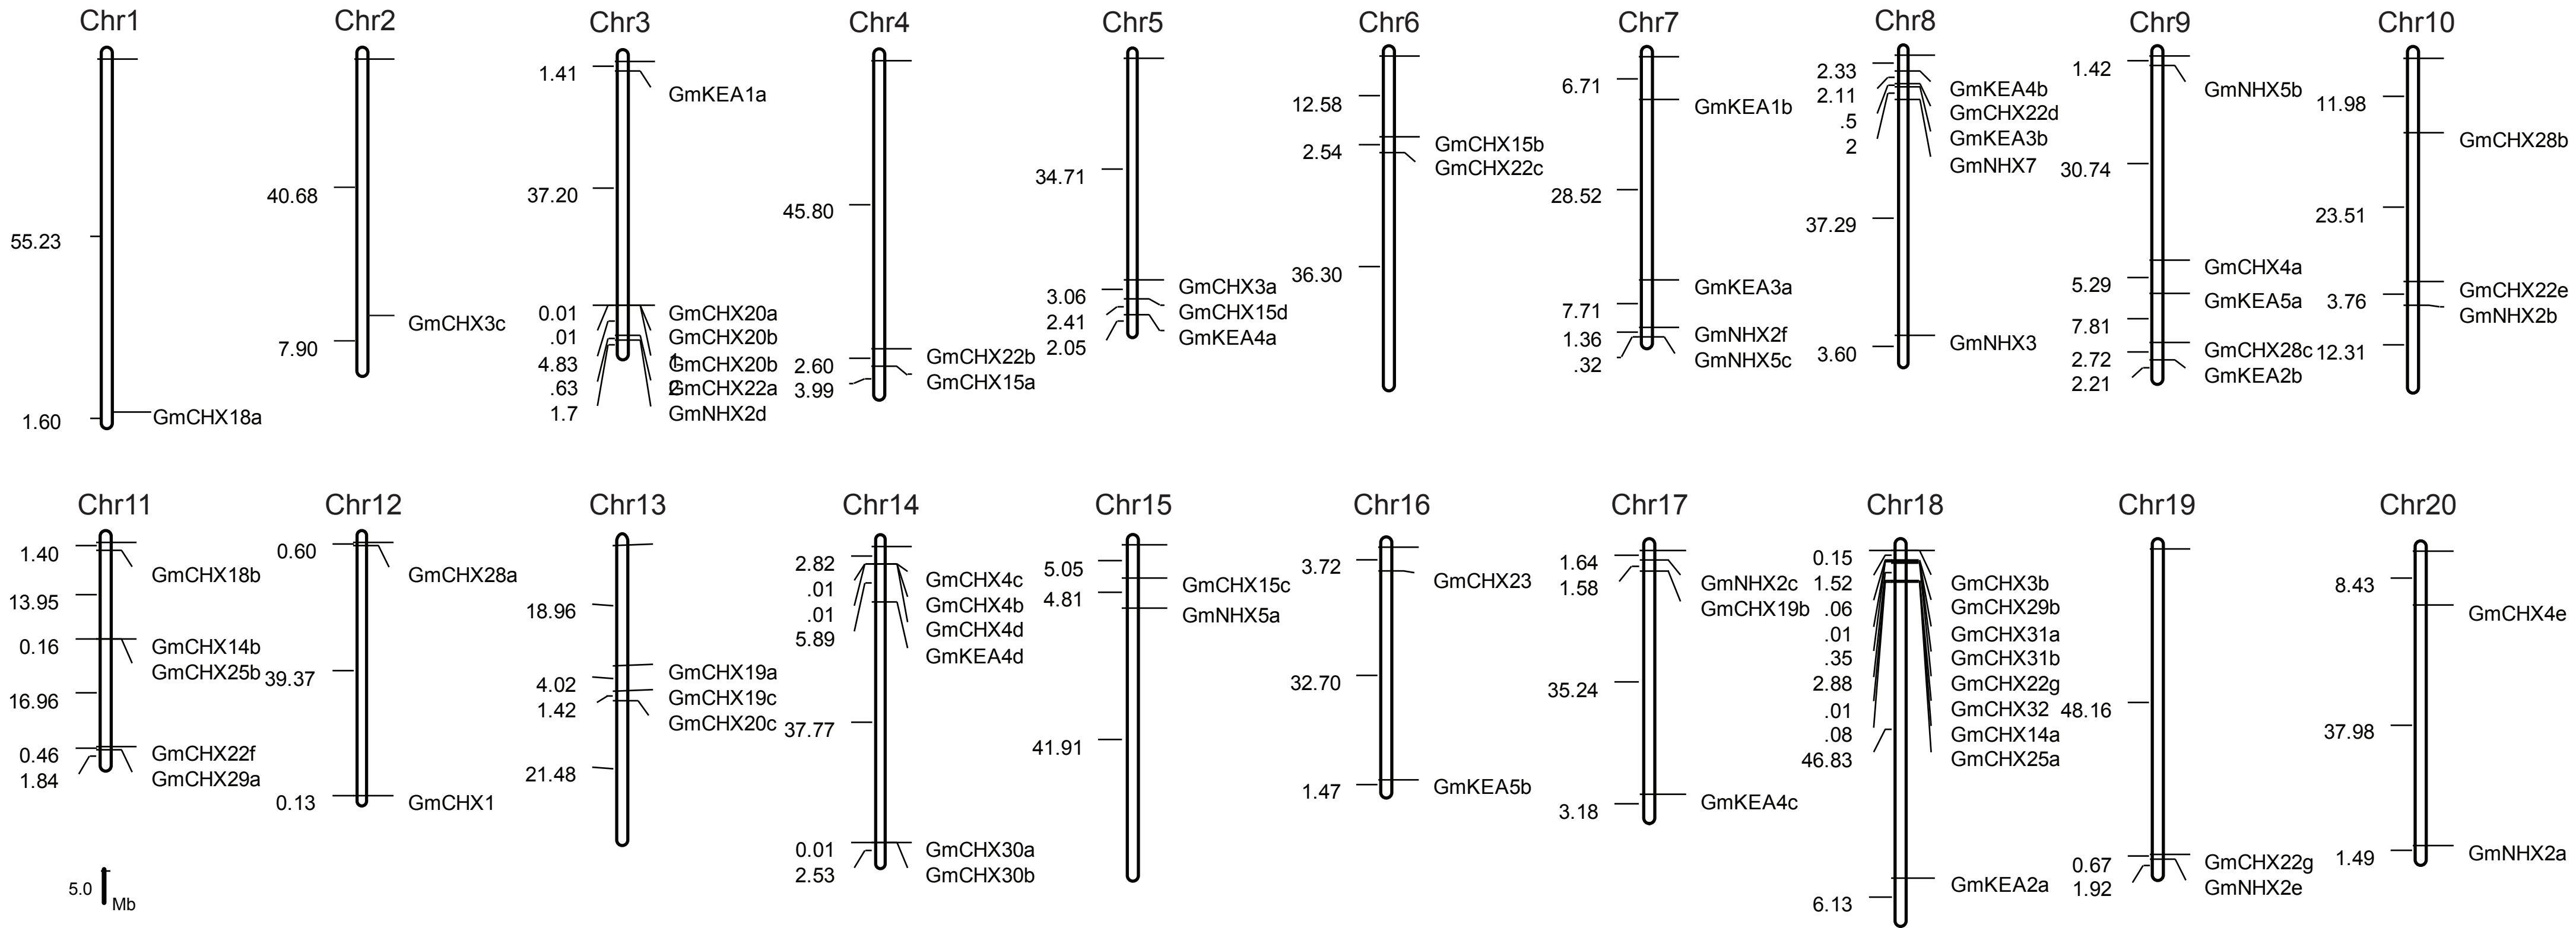

Supplement: s1 [file s1]
